# Supplementary material
Source: PubMed Central journal article supplement (PMC8748126)
Supplement: ajtr0013-13791-f4.pdf [file ajtr0013-13791-f4.pdf]

## Pharmacokinetic and pharmacodynamic properties of ciprofol

### Supplementary File 1. Inclusion and exclusion criteria.

The subjects had no potential difficult airway problems nor had previously experienced serious primary diseases of vital organs, including liver, kidney, digestive tract, hemopathy or metabolic disorders.

The exclusion criteria included allergy to either propofol or the ciprofol emulsion components (soybean oil, glycerin, triglycerides, egg yolk lecithin, sodium oleic acid and sodium hydroxide). Subjects who had a history of substance abuse, any symptoms of long-term use of benzodiazepines drugs, or a positive urine drug test were also excluded. Pregnant and lactating females or those who did not want to use medically acceptable forms of birth control during the entire course of the study were also excluded.

### Supplementary File 2. AE and SAE definitions.

The Investigator used clinical judgment to determine the relationship between AEs and the investigational drug. Alternative causes, such as natural history of the underlying diseases, concomitant therapy, other risk factors, and the temporal relationship of the event to the investigational product was considered and investigated. The causal relationship of an AE to the investigated drug was assessed by the investigator (or medically qualified delegate) using the classifications provided in the [Supplementary Table 1](#).

A SAE was any untoward medical occurrence at any dose: 1) resulted in death; 2) was life threatening (i.e. the subject was at immediate risk of death at the time the event occurred; it did not refer to an event which might hypothetically have caused death had it been more severe); 3) required in-subject hospitalization or prolongation of existing hospitalization; 4) resulted in persistent or significant disability/incapacity; 5) was a congenital anomaly/birth defect; 6) was a medically important event or reaction.

**Supplementary Table 1.** Classification of AEs as associated with drug

| Indicator                                                        | Definitely related | Probably related | Possible related | Possible not related | Not related |
|------------------------------------------------------------------|--------------------|------------------|------------------|----------------------|-------------|
| Reasonable time sequence                                         | Yes                | Yes              | Yes              | Yes                  | Yes         |
| Belongs to the type of reaction known to the study drug          | Yes                | Yes              | Yes              | No                   | No          |
| Reaction may be improved after discontinuation of the study drug | Yes                | Yes              | Yes or No        | Yes or No            | Yes or No   |
| Reaction may re-occur with medication                            | Yes                | ?                | ?                | ?                    | No          |
| There is another explanation for the reaction                    | No                 | No               | Yes              | Yes                  | Yes         |

### Supplementary File 3. Plasma sampling and PK measurements.

At first, 100  $\mu$ L plasma samples were pretreated for protein precipitation. Then, the plasma concentration of ciprofol was determined using a method of validated liquid chromatography (HPLC; Agilent 1260, Agilent Technologies, Wilmington, DE)-tandem mass spectrometry (LC-MS/MS; API 5500 mass spectrometer, SCIEX, Foster City, CA). The retention time of ciprofol was about 1.6 min, and the calibration curve was calculated by linear regression of the ciprofol peak area (weighting factor  $1/x^2$ ), with a linear range of 5.00 ng/mL to 5,000 ng/mL. All plasma concentration data were acquired and processed by Analyst 1.5.2 (Applied Biosystem, CA, US) and Watson LIMS V7.2.0.02 (PSS, Inc, Wayne, PA) software. The plasma pharmacokinetic parameters, including  $C_{max}$ ,  $AUC_{0-30 \text{ min}}$ ,  $AUC_{0-1 \text{ h}}$ ,  $AUC_{0-\text{inf}}$ ,  $T_{max}$ ,  $Vz$ ,  $T_{1/2Z}$ , clearance (CL) and mean residence time (MRT) were calculated by a non-compartment model 10. Systemic exposure was estimated as the area under the curve ( $AUC_{0-t}$ ) from the time of dosing to the last measurable time point (t) by application of the trapezoidal rule using the following equation:  $AUC_{(i, i+1)} = (T_{i+1} - T_i) (C_i + C_{i+1}) / 2$  where  $AUC_{0-t}$  is the sum of all  $AUC_{(i, i+1)}$ . The area under the first moment curve was estimated similarly and extrapolated to infinity according to the following equation:  $AUC_{0-\infty} = AUC_{0-t} + C_t / \lambda_z$ . Of which,  $C_t$  was the final determination of plasma concentration. And  $\lambda_z$  was an elimination rate constant, which is the slope of the end segment for the semi-log plasma concentration-time curve calculated using the linear regression method.

## Pharmacokinetic and pharmacodynamic properties of ciprofol

**Supplementary Table 2.** Modified quality of recovery-9 (QoR-9) questionnaire

| QoR-questions                                                          | Not at all | Some of time | Most of time |
|------------------------------------------------------------------------|------------|--------------|--------------|
| Had a feeling of general well-being                                    | 0          | 1            | 2            |
| Had support from others (especially doctors and nurses)                | 0          | 1            | 2            |
| Been able to understand instructions and advice. Not being confused    | 0          | 1            | 2            |
| Had a feeling can look after personal toilet and hygiene unaided       | 0          | 1            | 2            |
| Had a feeling can pass urine and having no trouble with bowel function | 0          | 1            | 2            |
| Been able to breathe easily                                            | 0          | 1            | 2            |
| Been free from headache, backache or muscle pains                      | 0          | 1            | 2            |
| Been free from nausea, dry-retching or vomiting                        | 0          | 1            | 2            |
| Been free from experiencing severe pain, or constant moderate pain     | 0          | 1            | 2            |
| Summary score                                                          |            |              | 18           |

### Supplementary File 4. Data acquisition and management.

The Electronic Data Capture (EDC) System was employed in this trial and an electronic case report form (eCRF) was used to collect the data specified in the protocol: the Clinical Study Coordinator (CRC), designated by the principal investigator (PI), timely and accurately input the data from the original medical records into the eCRF, then the data were simultaneously logically-checked by the EDC, and textual data were also manually checked by the data administrator. Once the data from all subjects had been completely and accurately entered, they were reviewed by the PI, sponsor, statisticians and data administrator again to confirm the integrity and accuracy of the database, and finally the database was locked by the data administrator. Subsequently, the data administrator imported appropriate data into the specified database and submitted it to statisticians for statistical analyses.

**Supplementary Table 3.** Laboratory examinations

|                                | 0.40 mg/kg (n = 6)   | 0.60 mg/kg (n = 6)   | 0.90 mg/kg (n = 6)   |
|--------------------------------|----------------------|----------------------|----------------------|
| Blood routine                  |                      |                      |                      |
| Hemoglobin (g/L)               |                      |                      |                      |
| Baseline                       | 147.0 (124.0, 151.0) | 142.5 (138.0, 157.0) | 145.5 (136.0, 156.0) |
| 24 h of after administration   | 145.5 (118.0, 151.0) | 136.5 (132.0, 155.0) | 145.0 (132.0, 158.0) |
| Red blood cell ( $10^{12}/L$ ) |                      |                      |                      |
| Baseline                       | 4.92 (4.25, 5.11)    | 4.85 (4.60, 5.05)    | 4.95 (4.59, 5.20)    |
| 24 h of after administration   | 4.87 (3.99, 5.02)    | 4.70 (4.57, 4.99)    | 4.85 (4.56, 5.19)    |
| Platelet count ( $10^9/L$ )    |                      |                      |                      |
| Baseline                       | 258.5 (249.0, 294.0) | 205.5 (170.0, 233.0) | 224.5 (204.0, 250.0) |
| 24 h of after administration   | 235.0 (208.0, 269.0) | 208.5 (168.0, 261.0) | 207.0 (196.0, 221.0) |
| White blood cell ( $10^9/L$ )  |                      |                      |                      |
| Baseline                       | 5.64 (4.62, 6.94)    | 5.22 (4.67, 6.23)    | 5.42 (4.37, 6.26)    |
| 24 h of after administration   | 4.86 (4.31, 7.39)    | 5.39 (4.95, 6.35)    | 4.76 (4.46, 6.82)    |
| Neutrophils (%)                |                      |                      |                      |
| Baseline                       | 58.5 (56.9, 61.7)    | 57.3 (55.1, 61.0)    | 57.0 (52.5, 58.9)    |
| 24 h of after administration   | 60.6 (56.2, 65.9)    | 57.3 (55.3, 60.0)    | 58.0 (53.4, 64.4)    |
| Lymphocytes (%)                |                      |                      |                      |
| Baseline                       | 33.0 (32.0, 33.3)    | 33.9 (27.6, 35.8)    | 35.0 (31.1, 36.8)    |
| 24 h of after administration   | 30.9 (26.5, 34.4)    | 33.2 (30.7, 35.8)    | 32.8 (25.6, 35.9)    |
| Monocytes (%)                  |                      |                      |                      |
| Baseline                       | 5.80 (5.40, 6.00)    | 7.05 (6.10, 7.40)    | 6.45 (5.50, 8.10)    |
| 24 h of after administration   | 5.80 (5.20, 5.90)    | 6.30 (5.40, 6.80)    | 6.75 (5.70, 8.30)    |

## Pharmacokinetic and pharmacodynamic properties of ciprofol

|                               |                      |                      |                      |
|-------------------------------|----------------------|----------------------|----------------------|
| Hematocrit (L/L)              |                      |                      |                      |
| Baseline                      | 0.43 (0.39, 0.44)    | 0.43 (0.40, 0.45)    | 0.45 (0.40, 0.46)    |
| 24 h of after administration  | 0.43 (0.36, 0.44)    | 0.41 (0.39, 0.45)    | 0.44 (0.41, 0.47)    |
| Blood biochemistry            |                      |                      |                      |
| Aspartate transaminase (IU/L) |                      |                      |                      |
| Baseline                      | 19.0 (18.0, 25.0)    | 19.5 (19.0, 22.0)    | 20.0 (19.0, 26.0)    |
| 24 h of after administration  | 18.0 (16.0, 19.0)    | 17.5 (17.0, 19.0)    | 19.0 (18.0, 23.0)    |
| Alanine transaminase (IU/L)   |                      |                      |                      |
| Baseline                      | 17.5 (11.0, 21.0)    | 12.0 (11.0, 19.0)    | 16.5 (13.0, 24.0)    |
| 24 h of after administration  | 16.0 (9.0, 22.0)     | 11.5 (8.0, 16.0)     | 14.5 (10.0, 23.0)    |
| Alkaline phosphatase (IU/L)   |                      |                      |                      |
| Baseline                      | 59.0 (52.0, 69.0)    | 58.5 (53.0, 74.0)    | 62.0 (60.0, 70.0)    |
| 24 h of after administration  | 56.5 (52.0, 64.0)    | 54.5 (49.0, 61.0)    | 55.0 (54.0, 73.0)    |
| Lactate dehydrogenase (IU/L)  |                      |                      |                      |
| Baseline                      | 182.5 (159.0, 196.0) | 157.0 (147.0, 160.0) | 173.0 (164.0, 192.0) |
| 24 h of after administration  | 163.5 (137.0, 174.0) | 148.0 (131.0, 168.0) | 167.5 (160.0, 171.0) |
| Total protein (g/L)           |                      |                      |                      |
| Baseline                      | 74.5 (72.6, 75.8)    | 76.1 (72.9, 79.0)    | 77.7 (74.1, 79.2)    |
| 24 h of after administration  | 72.6 (67.3, 74.1)    | 71.5 (70.3, 74.4)    | 75.5 (73.4, 77.8)    |
| Albumin (g/L)                 |                      |                      |                      |
| Baseline                      | 48.3 (46.7, 49.5)    | 50.6 (48.9, 52.9)    | 49.0 (47.5, 49.6)    |
| 24 h of after administration  | 45.7 (44.4, 46.8)    | 47.5 (45.0, 49.9)    | 47.2 (45.3, 48.6)    |
| Total bilirubin (µmol/L)      |                      |                      |                      |
| Baseline                      | 12.3 (11.3, 16.5)    | 14.9 (12.5, 18.0)    | 10.8 (9.9, 12.7)     |
| 24 h of after administration  | 10.6 (9.8, 13.6)     | 14.0 (10.2, 20.5)    | 13.4 (9.8, 14.5)     |
| Ureophil (mmol/L)             |                      |                      |                      |
| Baseline                      | 3.81 (3.50, 5.50)    | 5.00 (3.80, 6.19)    | 4.10 (3.36, 4.60)    |
| 24 h of after administration  | 4.00 (3.60, 4.40)    | 3.85 (3.50, 4.30)    | 3.68 (3.30, 5.10)    |
| Creatinine (µmol/L)           |                      |                      |                      |
| Baseline                      | 76.0 (52.0, 90.0)    | 64.5 (53.0, 73.0)    | 63.5 (56.0, 66.0)    |
| 24 h of after administration  | 59.5 (37.0, 77.0)    | 65.0 (49.0, 81.0)    | 70.0 (54.0, 72.0)    |
| Uric acid (µmol/L)            |                      |                      |                      |
| Baseline                      | 424.0 (276.0, 476.0) | 366.0 (230.0, 403.0) | 310.0 (268.0, 387.0) |
| 24 h of after administration  | 393.0 (235.0, 482.0) | 321.5 (247.0, 349.0) | 303.5 (253.0, 329.0) |
| K (mmol/L)                    |                      |                      |                      |
| Baseline                      | 4.14 (3.97, 4.28)    | 4.08 (4.00, 4.28)    | 4.07 (3.89, 4.23)    |
| 24 h of after administration  | 4.08 (3.97, 4.22)    | 4.31 (4.07, 4.34)    | 4.13 (3.78, 4.43)    |
| Na (mmol/L)                   |                      |                      |                      |
| Baseline                      | 139.9 (138.2, 140.4) | 141.2 (139.2, 141.5) | 139.1 (138.6, 142.2) |
| 24 h of after administration  | 138.2 (137.5, 139.0) | 138.9 (138.0, 141.3) | 139.0 (135.2, 139.0) |
| Ca (mmol/L)                   |                      |                      |                      |
| Baseline                      | 2.28 (2.24, 2.28)    | 2.39 (2.23, 2.46)    | 2.37 (2.33, 2.39)    |
| 24 h of after administration  | 2.21 (2.20, 2.35)    | 2.33 (2.29, 2.36)    | 2.30 (2.26, 2.39)    |
| Mg (mmol/L)                   |                      |                      |                      |
| Baseline                      | 0.81 (0.79, 0.89)    | 0.84 (0.77, 0.89)    | 0.82 (0.81, 0.84)    |
| 24 h of after administration  | 0.81 (0.78, 0.84)    | 0.79 (0.75, 0.82)    | 0.78 (0.73, 0.83)    |
| Triglyceride (mmol/L)         |                      |                      |                      |
| Baseline                      | 0.86 (0.59, 1.55)    | 0.81 (0.53, 1.39)    | 0.83 (0.56, 1.08)    |
| 24 h of after administration  | 1.08 (0.74, 1.33)    | 0.94 (0.69, 1.10)    | 0.96 (0.66, 1.00)    |

## Pharmacokinetic and pharmacodynamic properties of ciprofol

|                                               |                   |                    |                    |
|-----------------------------------------------|-------------------|--------------------|--------------------|
| Cholesterol (mmol/L)                          |                   |                    |                    |
| Baseline                                      | 4.41 (4.37, 4.54) | 4.43 (4.24, 4.47)  | 4.38 (3.62, 4.81)  |
| 24 h of after administration                  | 4.20 (4.08, 4.30) | 4.23 (4.05, 4.29)  | 4.09 (3.53, 5.08)  |
| Low density lipoprotein cholesterol (mmol/L)  |                   |                    |                    |
| Baseline                                      | 2.59 (2.43, 2.99) | 2.38 (2.30, 2.44)  | 2.26 (1.65, 2.69)  |
| 24 h of after administration                  | 2.47 (2.39, 2.72) | 2.28 (2.13, 2.31)  | 2.28 (1.73, 2.81)  |
| High density lipoprotein cholesterol (mmol/L) |                   |                    |                    |
| Baseline                                      | 1.28 (1.22, 1.47) | 1.59 (1.32, 1.74)  | 1.62 (1.16, 2.02)  |
| 24 h of after administration                  | 1.21 (1.16, 1.28) | 1.43 (1.38, 1.54)  | 1.48 (1.17, 1.88)  |
| Glucose (mmol/L)                              |                   |                    |                    |
| Baseline                                      | 4.56 (4.35, 4.95) | 4.52 (4.20, 4.90)  | 4.62 (4.39, 5.04)  |
| 24 h of after administration                  | 4.60 (4.49, 4.79) | 4.88 (4.58, 5.07)  | 4.98 (4.76, 5.03)  |
| Urine routine                                 |                   |                    |                    |
| Red blood cell (/uL)                          |                   |                    |                    |
| Baseline                                      | 5.00 (3.00, 9.00) | 3.50 (1.00, 5.00)  | 4.00 (1.00, 14.00) |
| 24 h of after administration                  | 3.50 (2.00, 5.00) | 2.50 (1.00, 5.00)  | 2.50 (1.00, 8.00)  |
| White blood cell (/uL)                        |                   |                    |                    |
| Baseline                                      | 3.00 (1.00, 9.00) | 4.00 (1.00, 10.00) | 1.00 (0.00, 2.00)  |
| 24 h of after administration                  | 4.50 (1.00, 7.00) | 2.00 (1.00, 5.00)  | 1.50 (1.00, 2.00)  |
| Troponin (ng/L)                               |                   |                    |                    |
| Baseline                                      | 4.75 (3.60, 5.90) | 4.85 (3.70, 5.20)  | 3.55 (3.20, 3.90)  |
| 24 h of after administration                  | 4.90 (4.00, 6.00) | 4.35 (3.40, 5.40)  | 3.75 (3.40, 4.10)  |

Note: All data are presented as median (1st to 3rd) quartile.
